# Supplementary material
Source: PubMed Central journal article supplement (PMC5057532)
Supplement: NIHMS816763-supplement-Supp.pdf [file NIHMS816763-supplement-Supp.pdf]

Title: Post-diagnosis adiposity and survival among breast cancer patients: Influence of breast cancer subtype

Journal: Cancer Causes and Control

Author: Xuezheng Sun<sup>1</sup>, Hazel B. Nichols<sup>1,4</sup>, Whitney Robinson<sup>1</sup>, Mark E. Sherman<sup>2,3</sup>, Andrew F. Olshan<sup>1,4</sup>,  
Melissa A. Troester<sup>1,4</sup>

Corresponding Author:

Melissa A. Troester, Ph.D.  
Department of Epidemiology, CB 7435  
University of North Carolina at Chapel Hill  
Chapel Hill, NC 27599  
Tel: (919) 966-7408  
[troester@unc.edu](mailto:troester@unc.edu)

Supplementary Table 1. Characteristics of study population by BMI group, in the CBCS Phases I and II <sup>a</sup>.

| Characteristics                                         | Overall<br>(n=1109) | <25 kg/m <sup>2</sup><br>(n=395) | 25-<30 kg/m <sup>2</sup><br>(n=308) | 30+ kg/m <sup>2</sup><br>(n=411) | P-value |
|---------------------------------------------------------|---------------------|----------------------------------|-------------------------------------|----------------------------------|---------|
| Age (years)                                             |                     |                                  |                                     |                                  |         |
| Mean (SD)                                               | 50.60 (11.45)       | 48.64 (11.72)                    | 51.47 (11.15)                       | 51.82 (11.19)                    | <0.01   |
| <40                                                     | 188 (17)            | 90 (23)                          | 42 (14)                             | 56 (14)                          | <0.01   |
| 40-49                                                   | 427 (39)            | 163 (41)                         | 116 (38)                            | 148 (36)                         |         |
| 50-59                                                   | 220 (20)            | 56 (14)                          | 68 (22)                             | 96 (23)                          |         |
| ≥60                                                     | 274 (25)            | 84 (21)                          | 80 (26)                             | 110 (27)                         |         |
| Menopausal status                                       |                     |                                  |                                     |                                  |         |
| Premenopausal                                           | 541 (49)            | 209 (53)                         | 138 (45)                            | 194 (47)                         | 0.08    |
| Postmenopausal                                          | 568 (51)            | 184 (47)                         | 168 (55)                            | 216 (53)                         |         |
| Race                                                    |                     |                                  |                                     |                                  |         |
| White                                                   | 612 (55)            | 301 (77)                         | 173 (57)                            | 138 (34)                         | <0.01   |
| African American                                        | 497 (45)            | 92 (23)                          | 133 (43)                            | 272 (66)                         |         |
| Number of full-term pregnancy                           |                     |                                  |                                     |                                  |         |
| Nulliparous                                             | 168 (15)            | 73 (18)                          | 44 (14)                             | 51 (12)                          | <0.01   |
| 1-2                                                     | 541 (49)            | 214 (54)                         | 158 (52)                            | 169 (41)                         |         |
| ≥3                                                      | 400 (36)            | 106 (27)                         | 104 (34)                            | 190 (46)                         |         |
| Years since last full-term pregnancy among parous women |                     |                                  |                                     |                                  |         |
| <5                                                      | 72 (8)              | 38 (12)                          | 15 (6)                              | 19 (5)                           | <0.01   |
| 5-<10                                                   | 86 (9)              | 35 (11)                          | 29 (11)                             | 22 (6)                           |         |
| ≥10                                                     | 783 (83)            | 249 (77)                         | 218 (83)                            | 318 (89)                         |         |
| Family history of breast cancer <sup>b</sup>            |                     |                                  |                                     |                                  |         |
| Yes                                                     | 176 (16)            | 57 (15)                          | 50 (17)                             | 69 (17)                          | 0.66    |
| No                                                      | 901 (84)            | 326 (85)                         | 246 (83)                            | 331 (83)                         |         |
| Education                                               |                     |                                  |                                     |                                  |         |
| Lower than high school                                  | 187 (17)            | 41 (10)                          | 42 (14)                             | 104 (25)                         | <0.01   |
| High school/post high school                            | 616 (56)            | 197 (50)                         | 184 (60)                            | 235 (57)                         |         |

|                                    |          |          |          |          |       |
|------------------------------------|----------|----------|----------|----------|-------|
| College and above                  | 306 (28) | 155 (39) | 80 (26)  | 71 (17)  |       |
| Family income (thousand US dollar) |          |          |          |          |       |
| <15                                | 235 (23) | 65 (18)  | 56 (20)  | 114 (29) | <0.01 |
| 15-<30                             | 253 (25) | 61 (17)  | 70 (25)  | 122 (31) |       |
| 30-<50                             | 250 (24) | 86 (24)  | 77 (28)  | 87 (22)  |       |
| ≥50                                | 291 (28) | 152 (42) | 73 (26)  | 66 (17)  |       |
| Smoking                            |          |          |          |          |       |
| Never                              | 585 (53) | 205 (52) | 147 (48) | 233 (57) | 0.11  |
| Former                             | 345 (31) | 117 (30) | 107 (35) | 121 (29) |       |
| current                            | 184 (17) | 73 (18)  | 54 (18)  | 57 (14)  |       |
| Physical activity                  |          |          |          |          |       |
| yes                                | 566 (51) | 213 (54) | 159 (52) | 194 (47) | 0.14  |
| no                                 | 543 (49) | 180 (46) | 147 (48) | 216 (53) |       |
| Alcohol consumption                |          |          |          |          |       |
| No                                 | 344 (31) | 79 (20)  | 99 (32)  | 166 (40) | <0.01 |
| Yes                                | 764 (69) | 313 (80) | 207 (68) | 244 (60) |       |
| HRT                                |          |          |          |          |       |
| Never                              | 794 (72) | 276 (70) | 210 (69) | 308 (75) | 0.06  |
| Former                             | 218 (20) | 87 (22)  | 69 (23)  | 62 (15)  |       |
| Current                            | 95 (9)   | 29 (7)   | 27 (9)   | 39 (10)  |       |
| OC                                 |          |          |          |          |       |
| Never                              | 368 (33) | 104 (27) | 110 (36) | 154 (38) | <0.01 |
| Ever                               | 737 (67) | 287 (73) | 194 (64) | 256 (62) |       |
| Lymph node status                  |          |          |          |          |       |
| Positive                           | 439 (40) | 144 (37) | 130 (43) | 165 (41) | 0.27  |
| Negative                           | 665 (60) | 248 (63) | 175 (57) | 242 (59) |       |
| Intrinsic subtype                  |          |          |          |          |       |
| Luminal                            | 714 (64) | 266 (68) | 197 (64) | 251 (61) | 0.02  |
| Basal-like                         | 197 (18) | 53 (13)  | 61 (20)  | 83 (20)  |       |

|                                        |                 |          |          |          |          |      |
|----------------------------------------|-----------------|----------|----------|----------|----------|------|
|                                        | Her2-positive   | 72 (6)   | 23 (6)   | 25 (8)   | 24 (6)   |      |
|                                        | Normal-like     | 126 (11) | 51 (13)  | 23 (8)   | 52 (13)  |      |
| Tumor size (cm)                        |                 |          |          |          |          |      |
|                                        | ≤2              | 526 (49) | 205 (54) | 141 (47) | 180 (45) | 0.09 |
|                                        | >2-5            | 455 (42) | 151 (39) | 127 (43) | 177 (44) |      |
|                                        | >5              | 102 (9)  | 27 (7)   | 30 (10)  | 45 (11)  |      |
| Tumor stage (AJCC/UICC Stage Grouping) |                 |          |          |          |          |      |
|                                        | I               | 403 (37) | 157 (41) | 116 (39) | 130 (33) | 0.09 |
|                                        | II              | 543 (50) | 189 (49) | 141 (47) | 213 (53) |      |
|                                        | III+IV          | 133 (12) | 38 (10)  | 40 (13)  | 55 (14)  |      |
| Histology group                        |                 |          |          |          |          |      |
|                                        | Ductal          | 911 (82) | 312 (79) | 256 (84) | 343 (84) | 0.21 |
|                                        | Others          | 198 (18) | 81 (21)  | 50 (16)  | 67 (16)  |      |
| Nuclear grade <sup>c</sup>             |                 |          |          |          |          |      |
|                                        | Pleomorphism    | 204 (43) | 79 (42)  | 57 (43)  | 68 (44)  | 0.93 |
|                                        | Slight/moderate | 275 (57) | 111 (58) | 76 (57)  | 88 (56)  |      |
| Histologic grade <sup>c</sup>          |                 |          |          |          |          |      |
|                                        | Well/moderate   | 309 (65) | 125 (66) | 85 (64)  | 99 (63)  | 0.89 |
|                                        | Poor            | 170 (35) | 65 (34)  | 48 (36)  | 57 (37)  |      |
| Mitotic index <sup>c</sup>             |                 |          |          |          |          |      |
|                                        | Low             | 259 (54) | 115 (61) | 58 (44)  | 86 (55)  | 0.02 |
|                                        | High            | 218 (46) | 75 (39)  | 73 (56)  | 70 (45)  |      |

<sup>a</sup> P values for the comparisons across intrinsic subtypes were calculated by t test for continuous variables and x2 test for categorical variables except that when expected cell count was less than 5, they were calculated by Fisher exact test. Missing values were excluded from percentage calculations.

<sup>b</sup> First degree

<sup>c</sup> Only available in Phase I.

Supplementary Table 2. Characteristics of study population by WHR tertiles, in the CBCS Phases I and II <sup>a</sup>.

| Characteristics                                         | Overall<br>(n=1109) | <0.77<br>(n=282) | 0.77-<0.84<br>(n=382) | 0.84+<br>(n=445) | P-value |
|---------------------------------------------------------|---------------------|------------------|-----------------------|------------------|---------|
| Age (years)                                             |                     |                  |                       |                  |         |
| Mean (SD)                                               | 50.60 (11.45)       | 46.99 (10.46)    | 50.33 (11.50)         | 53.75 (11.01)    | <0.01   |
| <40                                                     | 188 (17)            | 83 (29)          | 62 (16)               | 43 (10)          | <0.01   |
| 40-49                                                   | 427 (39)            | 124 (44)         | 159 (42)              | 144 (32)         |         |
| 50-59                                                   | 220 (20)            | 36 (13)          | 70 (18)               | 114 (26)         |         |
| ≥60                                                     | 274 (25)            | 39 (14)          | 91 (24)               | 144 (32)         |         |
| Menopausal status                                       |                     |                  |                       |                  |         |
| Premenopausal                                           | 541 (49)            | 180 (64)         | 197 (52)              | 164 (37)         | <0.01   |
| Postmenopausal                                          | 568 (51)            | 102 (36)         | 185 (48)              | 281 (63)         |         |
| Race                                                    |                     |                  |                       |                  |         |
| White                                                   | 612 (55)            | 222 (79)         | 228 (60)              | 162 (36)         | <0.01   |
| African American                                        | 497 (45)            | 60 (21)          | 154 (40)              | 283 (64)         |         |
| Number of full-term pregnancy                           |                     |                  |                       |                  |         |
| Nulliparous                                             | 168 (15)            | 53 (19)          | 52 (14)               | 63 (14)          | <0.01   |
| 1-2                                                     | 541 (49)            | 160 (57)         | 204 (53)              | 177 (40)         |         |
| ≥3                                                      | 400 (36)            | 69 (24)          | 126 (33)              | 205 (46)         |         |
| Years since last full-term pregnancy among parous women |                     |                  |                       |                  |         |
| <5                                                      | 72 (8)              | 30 (13)          | 27 (8)                | 15 (4)           | <0.01   |
| 5-<10                                                   | 86 (9)              | 31 (14)          | 32 (10)               | 23 (6)           |         |
| ≥10                                                     | 783 (83)            | 168 (73)         | 271 (82)              | 345 (90)         |         |
| Family history of breast cancer <sup>b</sup>            |                     |                  |                       |                  |         |
| Yes                                                     | 176 (16)            | 239 (86)         | 318 (83)              | 356 (82)         | 0.52    |
| No                                                      | 901 (84)            | 40 (14)          | 63 (17)               | 76 (18)          |         |
| Education                                               |                     |                  |                       |                  |         |
| Lower than high school                                  | 187 (17)            | 12 (4)           | 52 (14)               | 123 (28)         | <0.01   |
| High school/post high school                            | 616 (56)            | 145 (51)         | 213 (56)              | 258 (58)         |         |
| College and above                                       | 306 (28)            | 125 (44)         | 117 (31)              | 64 (14)          |         |

|                                    |               |                   |          |          |          |       |
|------------------------------------|---------------|-------------------|----------|----------|----------|-------|
| Family income (thousand US dollar) |               |                   |          |          |          |       |
|                                    | <15           | 235 (23)          | 29 (11)  | 69 (19)  | 137 (34) | <0.01 |
|                                    | 15-<30        | 253 (25)          | 46 (17)  | 85 (24)  | 122 (30) |       |
|                                    | 30-<50        | 250 (24)          | 62 (23)  | 90 (25)  | 98 (24)  |       |
|                                    | ≥50           | 291 (28)          | 128 (48) | 116 (32) | 47 (12)  |       |
| Smoking                            |               |                   |          |          |          |       |
|                                    | Never         | 585 (53)          | 166 (58) | 211 (54) | 215 (48) | <0.01 |
|                                    | Former        | 345 (31)          | 92 (32)  | 120 (31) | 135 (30) |       |
|                                    | current       | 184 (17)          | 26 (9)   | 58 (15)  | 101 (22) |       |
| Alcohol consumption                |               |                   |          |          |          |       |
|                                    | No            | 344 (31)          | 52 (18)  | 123 (32) | 169 (38) | <0.01 |
|                                    | Yes           | 764 (69)          | 230 (82) | 258 (68) | 276 (62) |       |
| Physical activity                  |               |                   |          |          |          |       |
|                                    | no            | 566 (51)          | 130 (46) | 182 (48) | 231 (52) | 0.25  |
|                                    | yes           | 543 (49)          | 152 (54) | 200 (52) | 214 (48) |       |
| HRT                                |               |                   |          |          |          |       |
|                                    | Never         | 794 (72)          | 208 (74) | 267 (70) | 319 (72) | 0.35  |
|                                    | Former        | 218 (20)          | 58 (21)  | 77 (20)  | 83 (19)  |       |
|                                    | Current       | 95 (9)            | 16 (6)   | 37 (10)  | 42 (9)   |       |
| OC                                 |               |                   |          |          |          |       |
|                                    | Never         | 368 (33)          | 54 (19)  | 115 (30) | 199 (45) | <0.01 |
|                                    | Ever          | 737 (67)          | 226 (81) | 266 (70) | 245 (55) |       |
| Lymph node status                  |               | Lymph node status |          |          |          |       |
|                                    | Positive      | 439 (40)          | 103 (36) | 153 (40) | 183 (41) | 0.45  |
|                                    | Negative      | 665 (60)          | 178 (64) | 227 (60) | 260 (59) |       |
| Intrinsic subtype                  |               |                   |          |          |          |       |
|                                    | Luminal       | 714 (64)          | 199 (71) | 236 (62) | 279 (63) | 0.01  |
|                                    | Basal-like    | 197 (18)          | 36 (13)  | 80 (21)  | 81 (18)  |       |
|                                    | Her2-positive | 72 (6)            | 20 (7)   | 30 (8)   | 22 (5)   |       |
|                                    | Normal-like   | 126 (11)          | 27 (10)  | 36 (9)   | 63 (14)  |       |

|                                        |                 |          |          |          |          |       |
|----------------------------------------|-----------------|----------|----------|----------|----------|-------|
| Tumor size (cm)                        |                 |          |          |          |          |       |
|                                        | ≤2              | 526 (49) | 154 (56) | 179 (48) | 193 (44) | <0.01 |
|                                        | >2-5            | 455 (42) | 107 (39) | 158 (42) | 190 (44) |       |
|                                        | >5              | 102 (9)  | 13 (5)   | 38 (10)  | 51 (12)  |       |
| Tumor stage (AJCC/UICC Stage Grouping) |                 |          |          |          |          |       |
|                                        | I               | 403 (37) | 115 (42) | 142 (38) | 146 (34) | 0.01  |
|                                        | II              | 543 (50) | 139 (51) | 188 (50) | 216 (50) |       |
|                                        | III+IV          | 133 (12) | 20 (7)   | 45 (12)  | 68 (16)  |       |
| Histology group                        |                 |          |          |          |          |       |
|                                        | Ductal          | 911 (82) | 224 (79) | 307 (80) | 380 (85) | 0.07  |
|                                        | Others          | 198 (18) | 58 (21)  | 75 (20)  | 65 (15)  |       |
| Nuclear grade <sup>°</sup>             |                 |          |          |          |          |       |
|                                        | Pleomorphism    | 204 (43) | 59 (44)  | 92 (56)  | 76 (57)  | 0.72  |
|                                        | Slight/moderate | 275 (57) | 76 (56)  | 73 (44)  | 59 (44)  |       |
| Histologic grade <sup>°</sup>          |                 |          |          |          |          |       |
|                                        | Well/moderate   | 170 (35) | 47 (35)  | 53 (32)  | 70 (39)  | 0.39  |
|                                        | Poor            | 309 (65) | 88 (65)  | 112 (68) | 109 (61) |       |
| Mitotic index <sup>°</sup>             |                 |          |          |          |          |       |
|                                        | Low             | 259 (54) | 79 (59)  | 84 (51)  | 96 (54)  | 0.38  |
|                                        | High            | 218 (46) | 55 (41)  | 81 (49)  | 82 (46)  |       |

<sup>a</sup> The cutoff points of tertiles were 0.77 and 0.84 based on WHR distribution of controls of CBCS Phase I&II. P-values for the comparisons across intrinsic subtypes were calculated by t test for continuous variables and x2 test for categorical variables except that when expected cell count was less than 5, they were calculated by Fisher exact test. Missing values were excluded from percentage calculations.

<sup>b</sup> First degree.

<sup>c</sup> Only available in Phase I.
